# Supplementary material for: Synthesis of fluorescent nitrogen-doped carbon dots from dried shrimps for cell imaging and boldine drug delivery system
Source: Royal Society of Chemistry journal article supplement (doi:10.1039/c5ra24621k), 2016-01-01
Supplement: c5ra24621k1.pdf [file c5ra24621k1.pdf]

## **Synthesis of fluorescent nitrogen-doped carbon dots from dried shrimps for cell imaging and boldine drug delivery system<sup>†</sup>**

**Stephanie L. D'souza<sup>a</sup>, Balaji Deshmukh<sup>b</sup>, Jigna R. Bhamore,<sup>a</sup> Karuna A. Rawat<sup>a</sup>, Nibedita Lenka<sup>b</sup>, Suresh Kumar Kailasa<sup>a\*</sup>,**

*<sup>a</sup>Department of Chemistry, S. V. National Institute of Technology, Surat – 395007, Gujarat, India.*

*<sup>b</sup>National Center for Cell Science, NCCS Complex, Pune University Campus, Pune- 411 007, Maharashtra, India.*

*\*Corresponding author, Phone: +91-261-2201730; Fax: +91-261-2227334*

*E-mail: sureshkumarchem@gmail.com; skk@ashd.svnit.ac.in*

*<sup>†</sup>This work is dedicated to Ms. Stephanie L. D'souza, who was listed as a First co-author, DST-Inspire Ph.D student in the Department of Applied Chemistry, SVNIT from 2012 to 2015, passed away on 3<sup>rd</sup> May 2015 in Ahmedabad, due to heart stroke.*

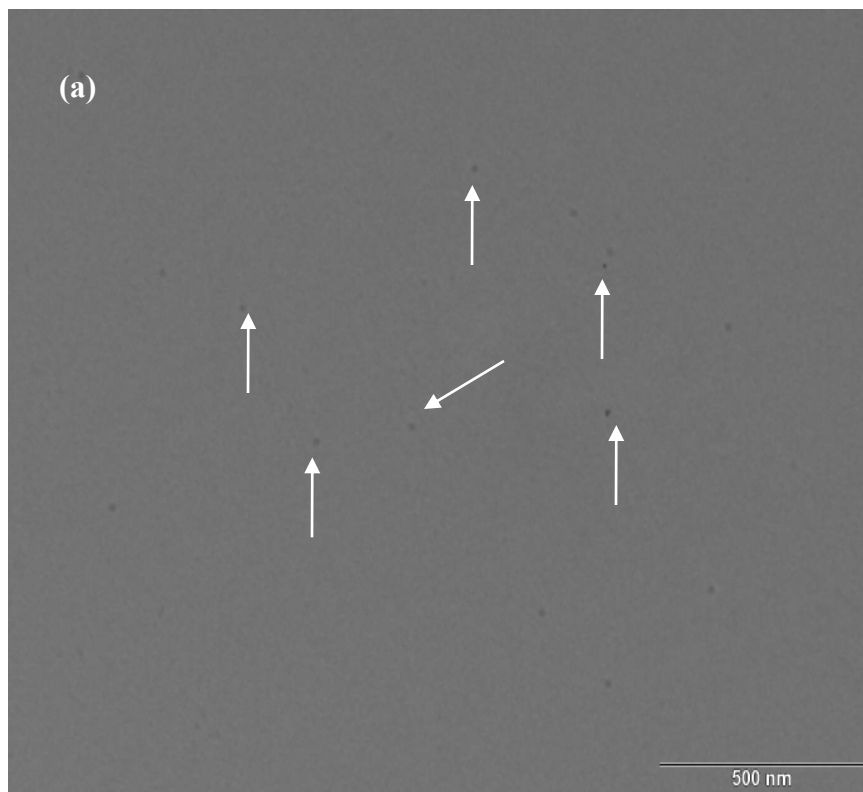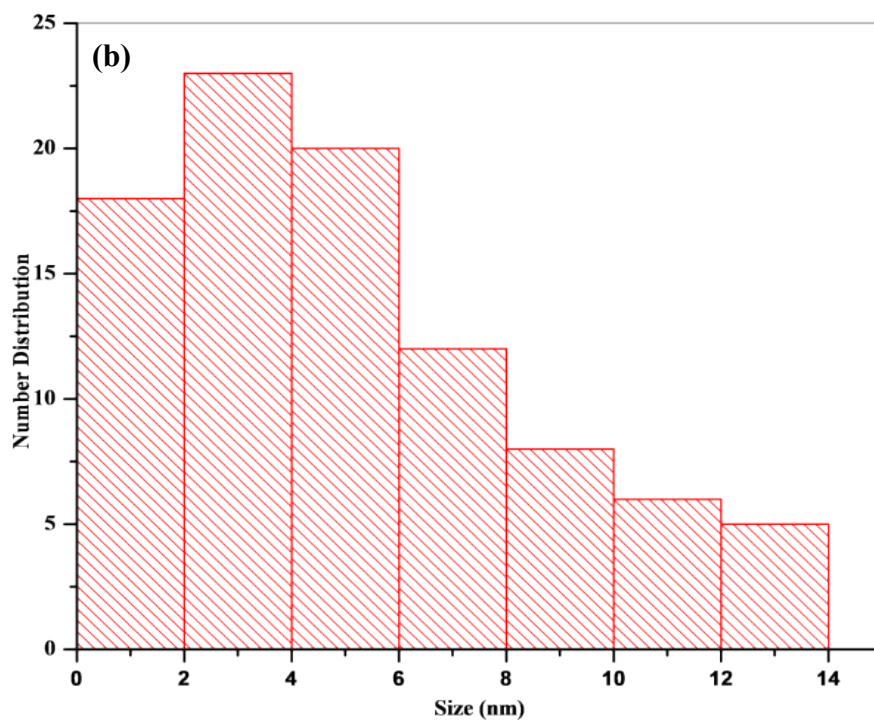

**Fig. S1.** (a) TEM image of CDs and (b) particle size distribution of CDs.

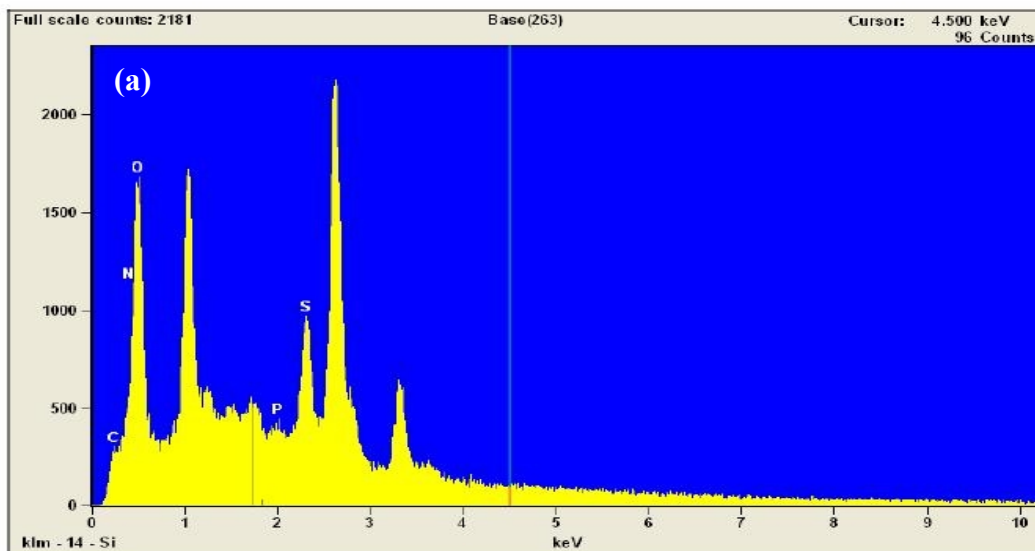

Quantitative Results Base (263)

| Element      | Net Counts | Net Counts Error | Weight % | Atom % |
|--------------|------------|------------------|----------|--------|
| C            | 3133       | +/- 190          | 21.24    | 26.40  |
| N            | 3270       | +/- 269          | 23.57    | 25.13  |
| O            | 15670      | +/- 260          | 48.65    | 45.41  |
| P            | 676        | +/- 124          | 0.32     | 0.15   |
| S            | 12229      | +/- 312          | 6.22     | 2.90   |
| S            | 0          | 0                | ---      | ---    |
| <b>Total</b> |            |                  | 100.00   | 100.00 |

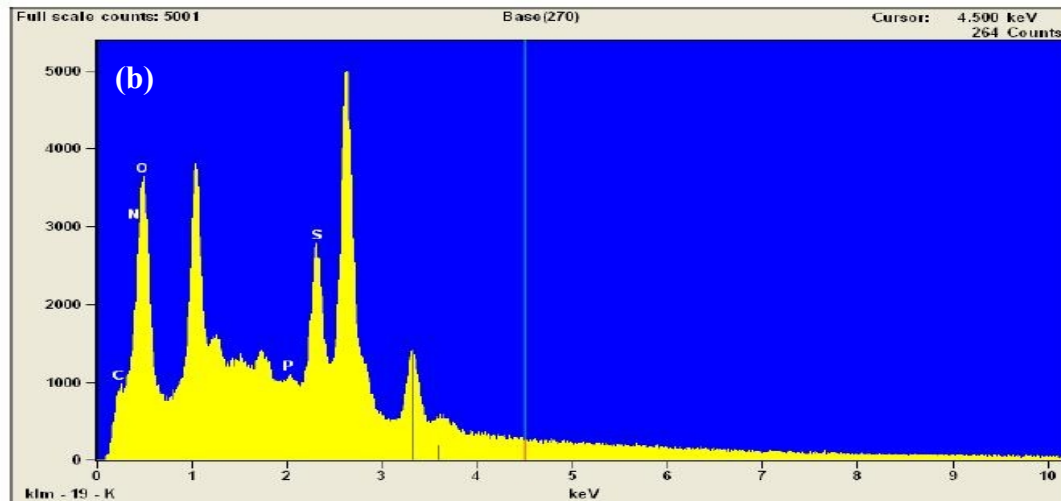

Quantitative Results Base (270)

| Element      | Net Counts | Net Counts Error | Weight % | Atom % |
|--------------|------------|------------------|----------|--------|
| C            | 13221      | +/- 348          | 26.29    | 32.08  |
| N            | 8566       | +/- 419          | 22.37    | 23.41  |
| O            | 44355      | +/- 564          | 45.85    | 42.00  |
| P            | 1542       | +/- 257          | 0.23     | 0.11   |
| S            | 32322      | +/- 664          | 5.26     | 2.40   |
| S            | 0          | 0                | ---      | ---    |
| <b>Total</b> |            |                  | 100.00   | 100.00 |

Fig. S2. EDX spectra of (a) blank CDs and (b) boldine-CDs,

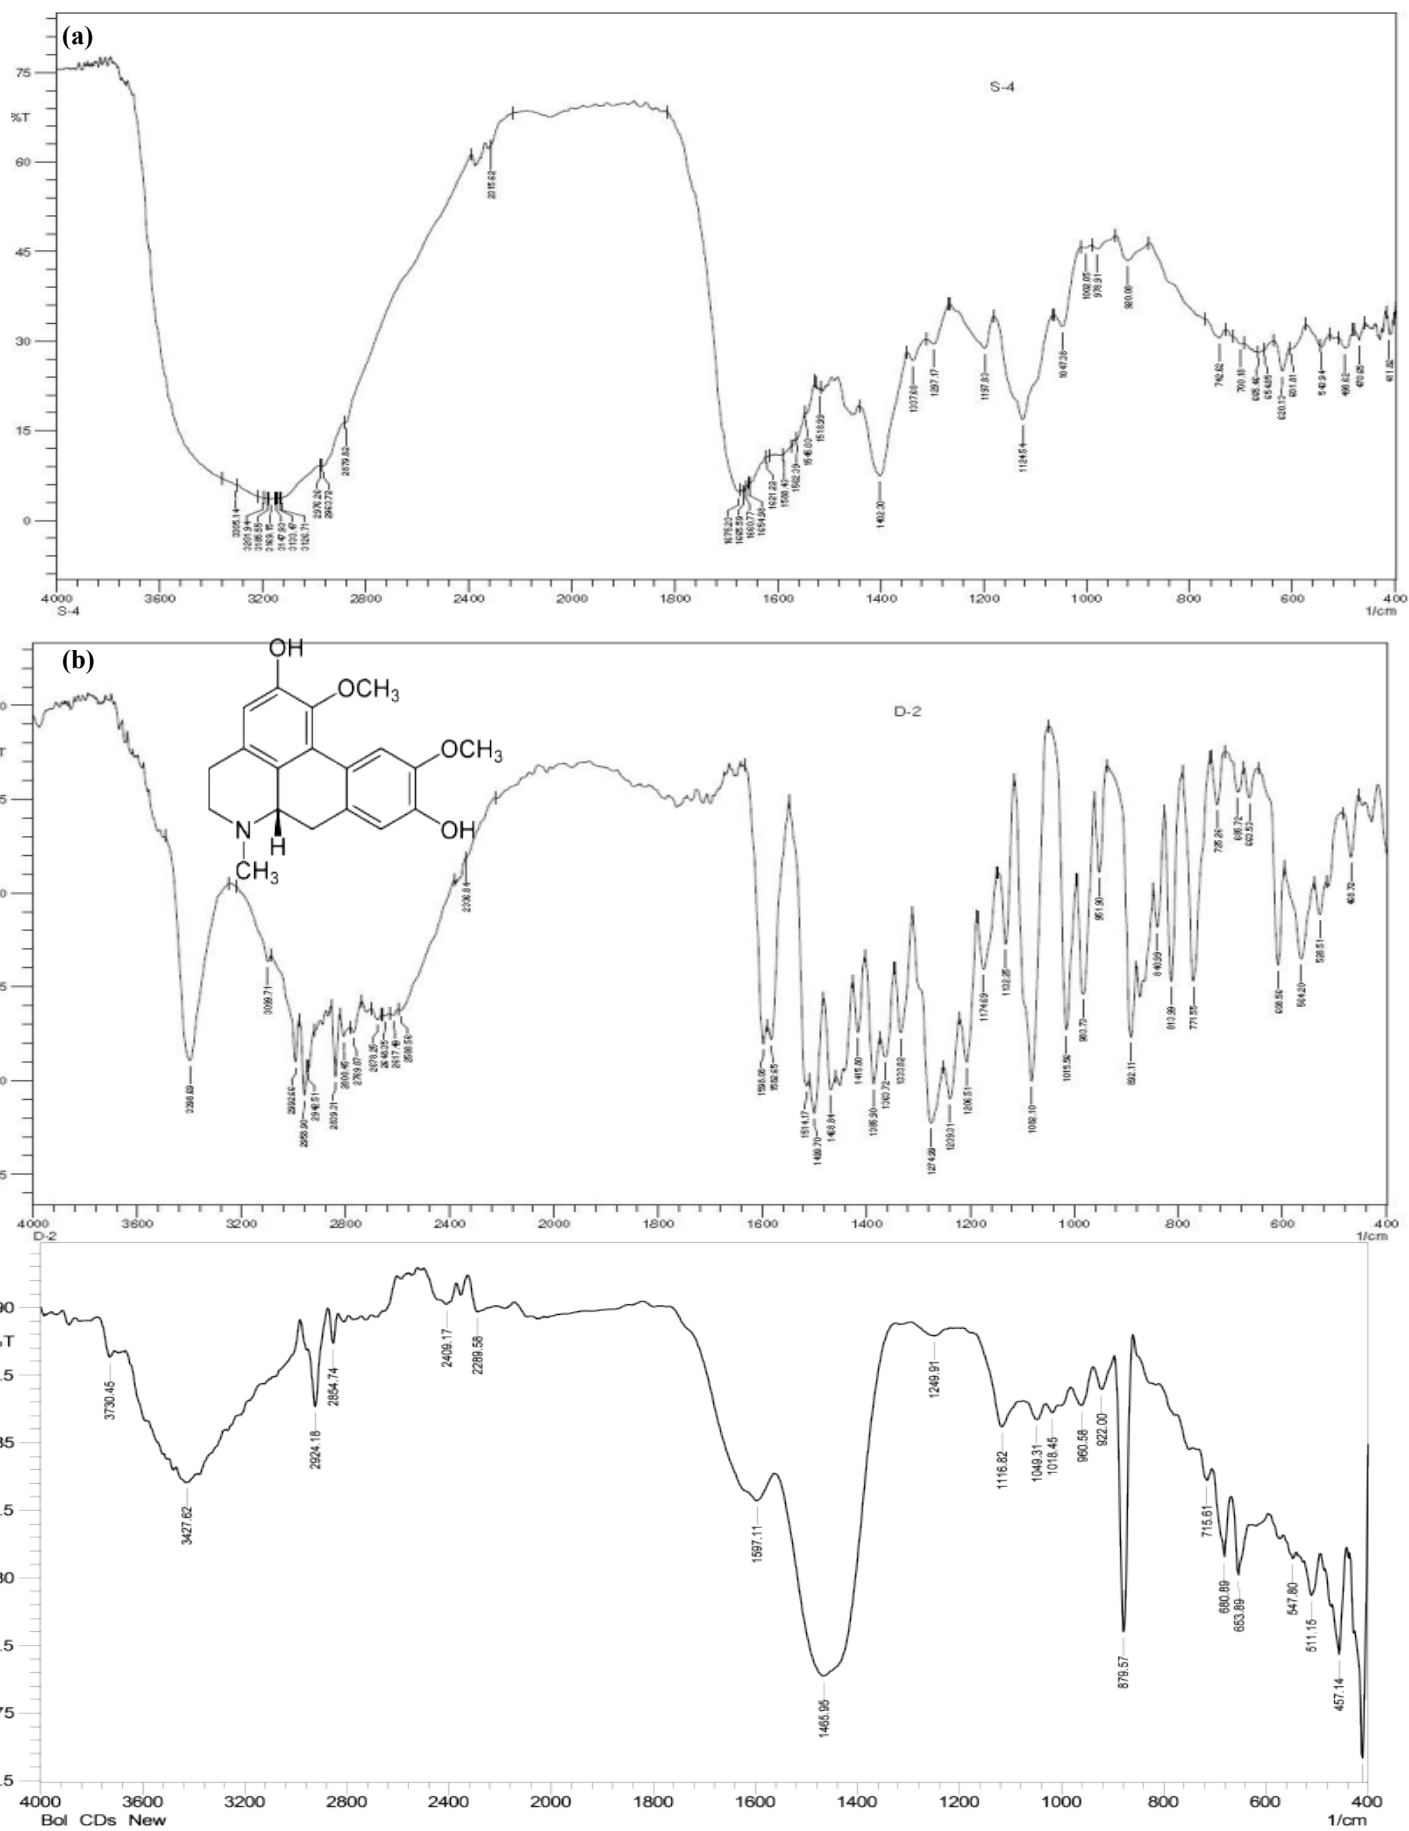

**Fig. S3.** FT-IR spectra of (a) blank CDs, (b) free boldine and (c) boldine-CDs

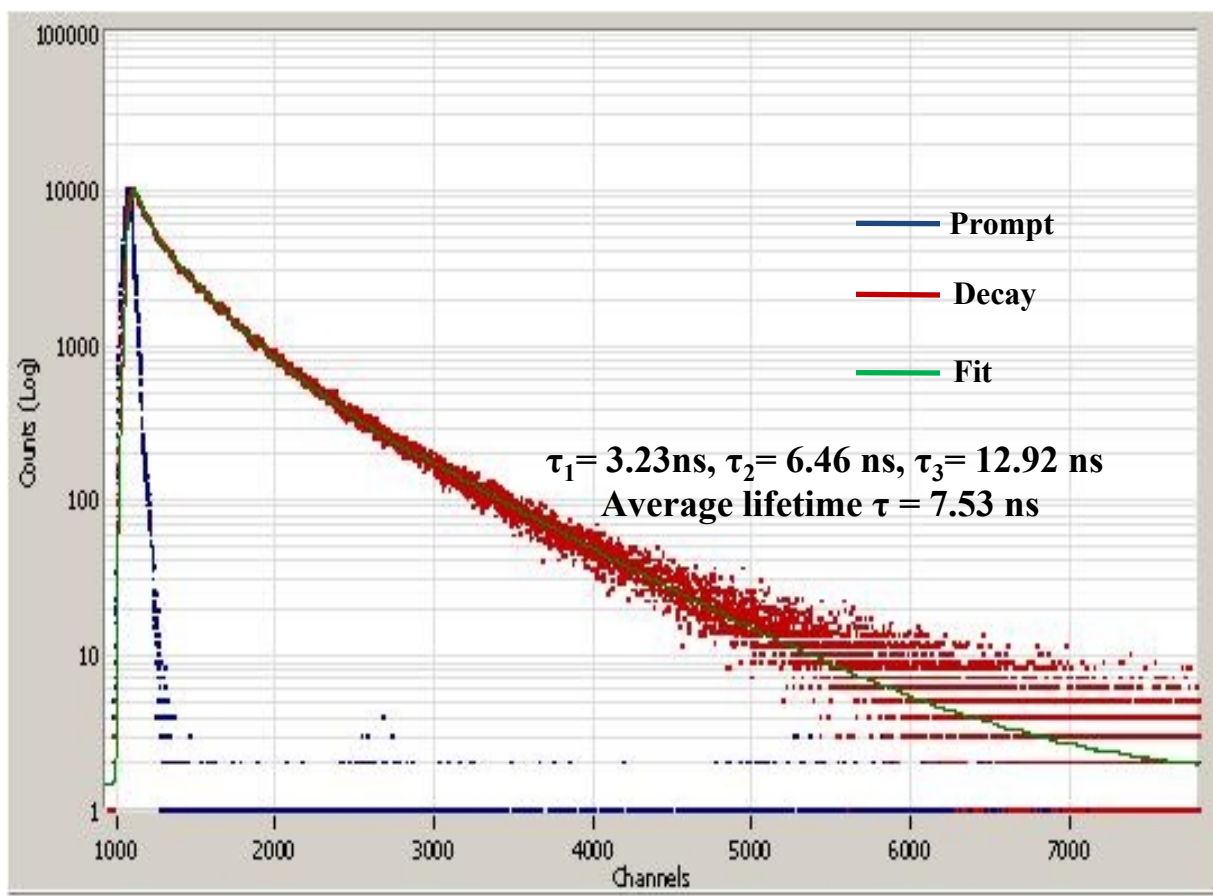

**Fig. S4.** The fluorescence decay (life time) curve of the CDs solution derived from prawn shrimp as a precursor upon excitation at 430 nm.

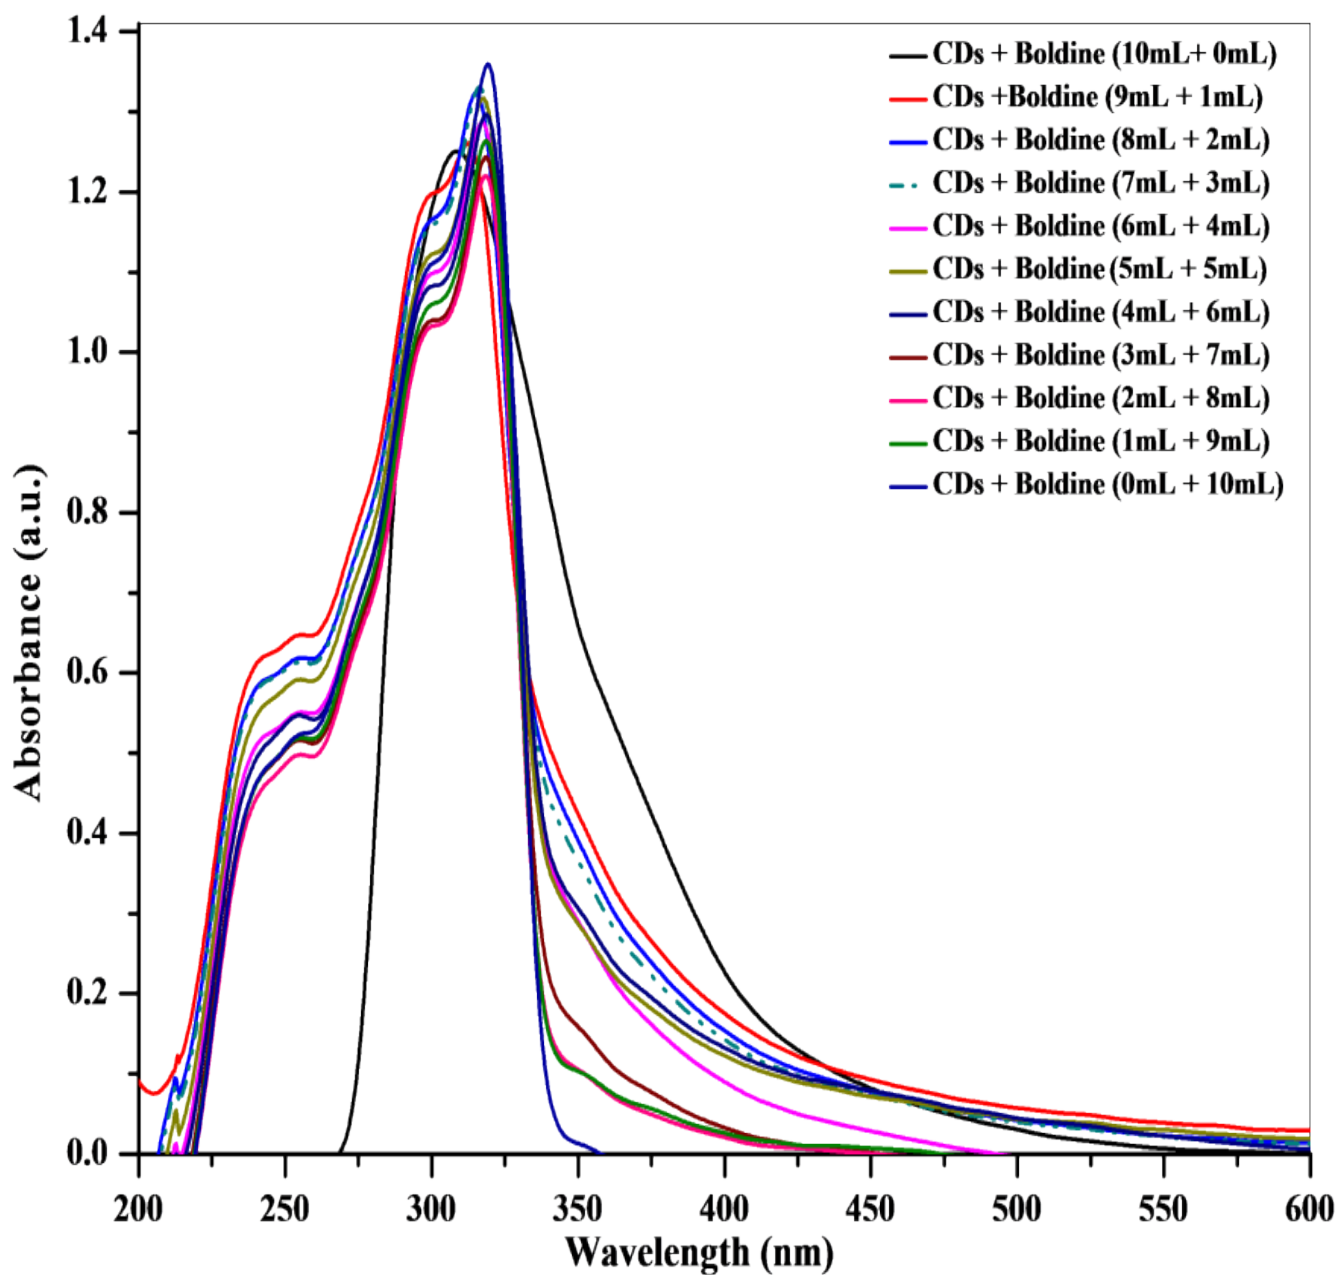

**Fig. S5.** UV-visible spectra of CDs at different volume ratios of boldine from 10:0 to 0:10 (CDs:boldine, v/v)

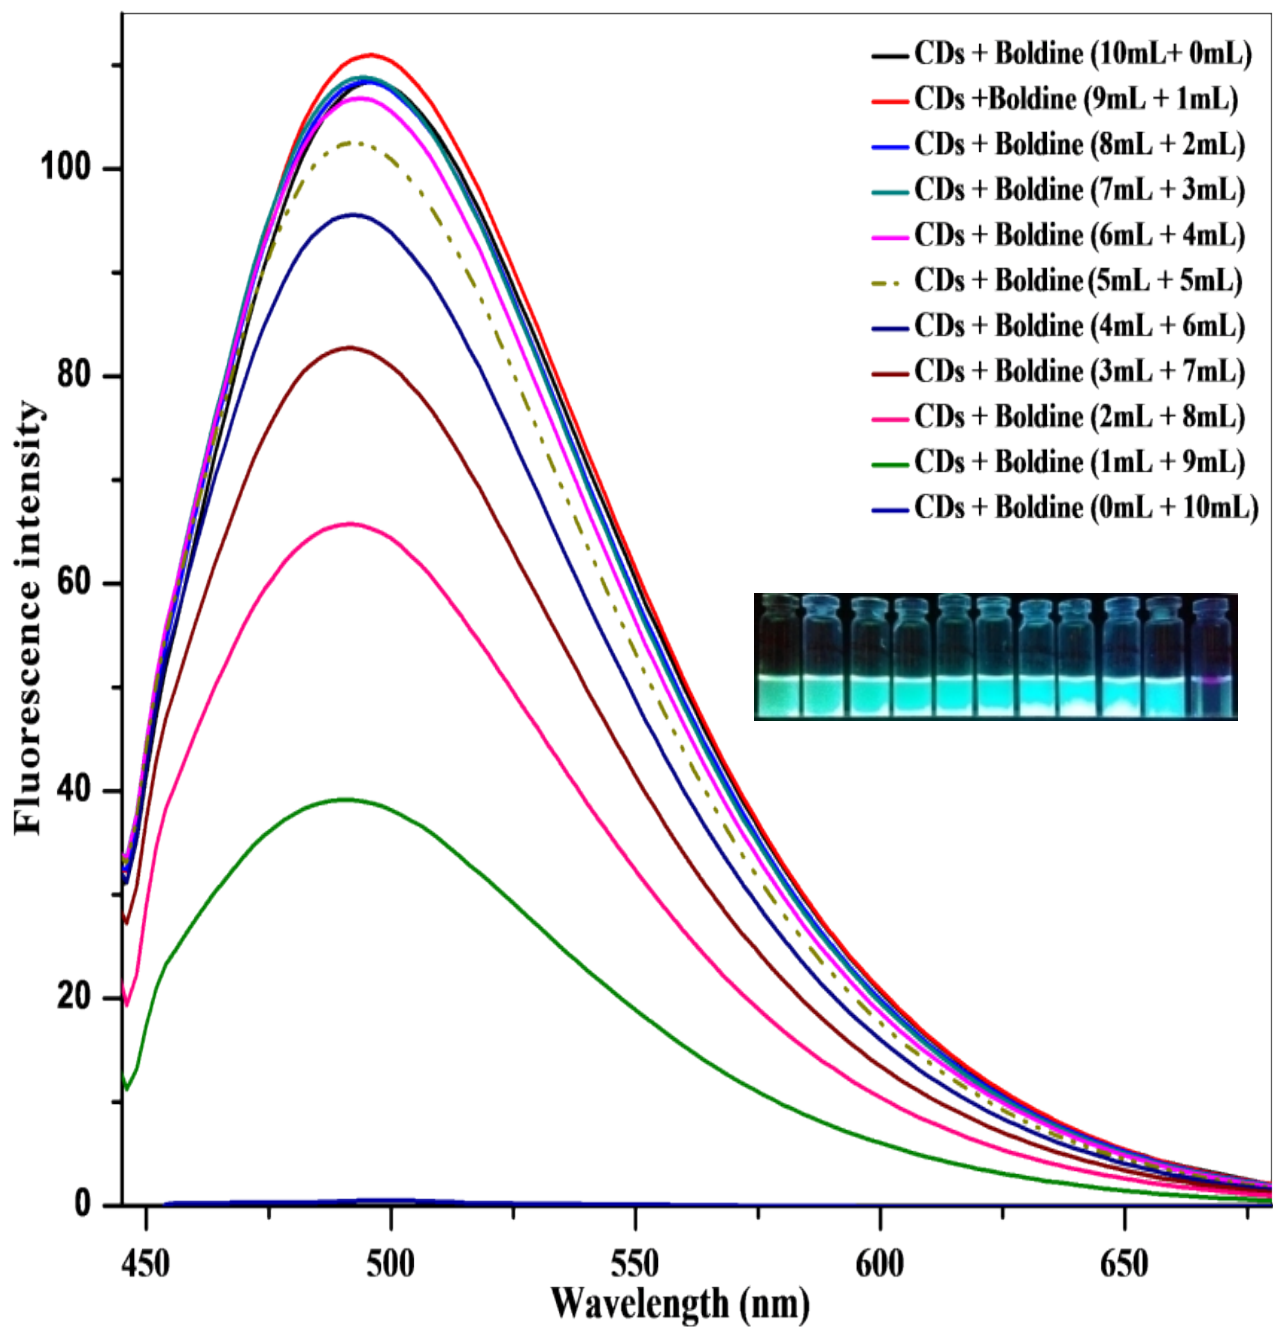

**Fig. S6.** Emission spectra of CDs at different volume ratios of boldine from 10:0 to 0:10 (CDs:boldine, v/v)
